# Supplementary material for: Interannual snow accumulation variability on glaciers derived from repeat, spatially extensive ground-penetrating radar surveys
Source: Copernicus journal article supplement (doi:10.5194/tc-12-3617-2018), 2018-11-22
Supplement: Supplementary file [file tc-12-3617-2018-supplement.pdf]

Supplement of The Cryosphere, 12, 3617–3633, 2018  
<https://doi.org/10.5194/tc-12-3617-2018-supplement>  
© Author(s) 2018. This work is distributed under  
the Creative Commons Attribution 4.0 License.

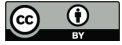

*Supplement of*

## **Interannual snow accumulation variability on glaciers derived from repeat, spatially extensive ground-penetrating radar surveys**

**Daniel McGrath et al.**

*Correspondence to:* Daniel McGrath ([daniel.mcgrath@colostate.edu](mailto:daniel.mcgrath@colostate.edu))

The copyright of individual parts of the supplement might differ from the CC BY 4.0 License.

1 **Supplementary Material**

2 Table S1. Observed density and calculated radar velocity at Gulkana and Wolverine glaciers.

3 Density uncertainty is the standard deviation of all density observations collected that year,

4 density velocity error is uncertainty introduced by uncertainty in density observations. Probe

5 velocity uncertainty is the standard error of the least-squares regression line.

6

| <b>Gulkana</b>   | <b>Density [kg m<sup>-3</sup>]</b> | <b>Density Velocity [m ns<sup>-1</sup>]</b> | <b>Probe velocity [m ns<sup>-1</sup>]</b> | <b>Mean Velocity [m ns<sup>-1</sup>]</b> |
|------------------|------------------------------------|---------------------------------------------|-------------------------------------------|------------------------------------------|
| 2013             | 365 ± 37                           | 0.229 ± 0.005                               | 0.216 ± 0.003                             | 0.223 ± 0.003                            |
| 2014             | 380 ± 29                           | 0.227 ± 0.004                               | 0.215 ± 0.003                             | 0.221 ± 0.003                            |
| 2015             | 328 ± 13                           | 0.235 ± 0.002                               | 0.228 ± 0.009                             | 0.231 ± 0.005                            |
| 2016             | 370 ± 27                           | 0.229 ± 0.004                               | 0.194 ± 0.005                             | 0.211 ± 0.003                            |
| 2017             | 366 ± 8                            | 0.229 ± 0.001                               | 0.227 ± 0.002                             | 0.228 ± 0.001                            |
| Mean             | 362 ± 11                           | 0.230 ± 0.002                               | 0.216 ± 0.002                             | 0.223 ± 0.001                            |
| <b>Wolverine</b> |                                    |                                             |                                           |                                          |
| 2013             | 446 ± 23                           | 0.218 ± 0.003                               | 0.193 ± 0.003                             | 0.207 ± 0.002                            |
| 2014             | 445 ± 43                           | 0.218 ± 0.006                               | 0.210 ± 0.002                             | 0.214 ± 0.003                            |
| 2015             | 414 ± 14                           | 0.222 ± 0.002                               | 0.235 ± 0.002                             | 0.229 ± 0.001                            |
| 2016             | 456 ± 6                            | 0.216 ± 0.001                               | 0.229 ± 0.003                             | 0.223 ± 0.002                            |
| 2017             | 438 ± 12                           | 0.219 ± 0.002                               | 0.217 ± 0.002                             | 0.218 ± 0.001                            |
| Mean             | 440 ± 10                           | 0.219 ± 0.001                               | 0.217 ± 0.001                             | 0.218 ± 0.001                            |

7

8

9

10

11

12

13

14

15

16

17

18

19

20

21

22

23

24

25

26 Table S2. Glacier-wide average  $B_w$  from different approaches across study interval.

27

| <b>Method</b>                              | <b>2013</b> | <b>2014</b> | <b>2015</b> | <b>2016</b> | <b>2017</b> |
|--------------------------------------------|-------------|-------------|-------------|-------------|-------------|
| <b>Gulkana <math>B_w</math> [m w.e.]</b>   |             |             |             |             |             |
| <b>MVR</b>                                 | 1.38        | 1.44        | 0.96        | 1.31        | 0.65        |
| <b>Regression Tree</b>                     | 1.38        | 1.44        | 0.95        | 1.32        | 0.65        |
| <b>Z - CL only</b>                         | 1.40        | 1.38        | 0.81        | 1.27        | 0.65        |
| <b>Z - All</b>                             | 1.37        | 1.45        | 0.94        | 1.28        | 0.64        |
| <b>Site-Index</b>                          | 1.30        | 1.31        | 0.77        | 1.07        | 0.57        |
| <b>Profile</b>                             | 1.44        | 1.45        | 0.97        | 1.36        | 0.64        |
| <b>Mean</b>                                | 1.38        | 1.41        | 0.90        | 1.27        | 0.63        |
| <b>Wolverine <math>B_w</math> [m w.e.]</b> |             |             |             |             |             |
| <b>MVR</b>                                 | 2.83        | 2.17        | 2.70        | 3.56        | 2.14        |
| <b>Regression Tree</b>                     | 2.84        | 2.06        | 2.55        | 3.47        | 2.04        |
| <b>Z - CL only</b>                         | 2.31        | 1.87        | 2.36        | 3.37        | 1.77        |
| <b>Z - All</b>                             | 2.58        | 1.97        | 2.51        | 3.44        | 1.95        |
| <b>Site-Index</b>                          | 2.24        | 1.74        | 2.37        | 3.38        | 1.70        |
| <b>Profile</b>                             | 2.30        | 1.79        | 2.49        | 3.54        | 1.89        |
| <b>Mean</b>                                | 2.52        | 1.93        | 2.50        | 3.46        | 1.91        |

28

29

30

31

32

33

34

35

36

37

38

39

40

41

42

43

44

45

46

47

48

49 Figure S1. GPR surveys (a,c,e,g,h) and MVR model residuals (b,d,f,h,j) for Gulkana Glacier for  
50 2013-2017.

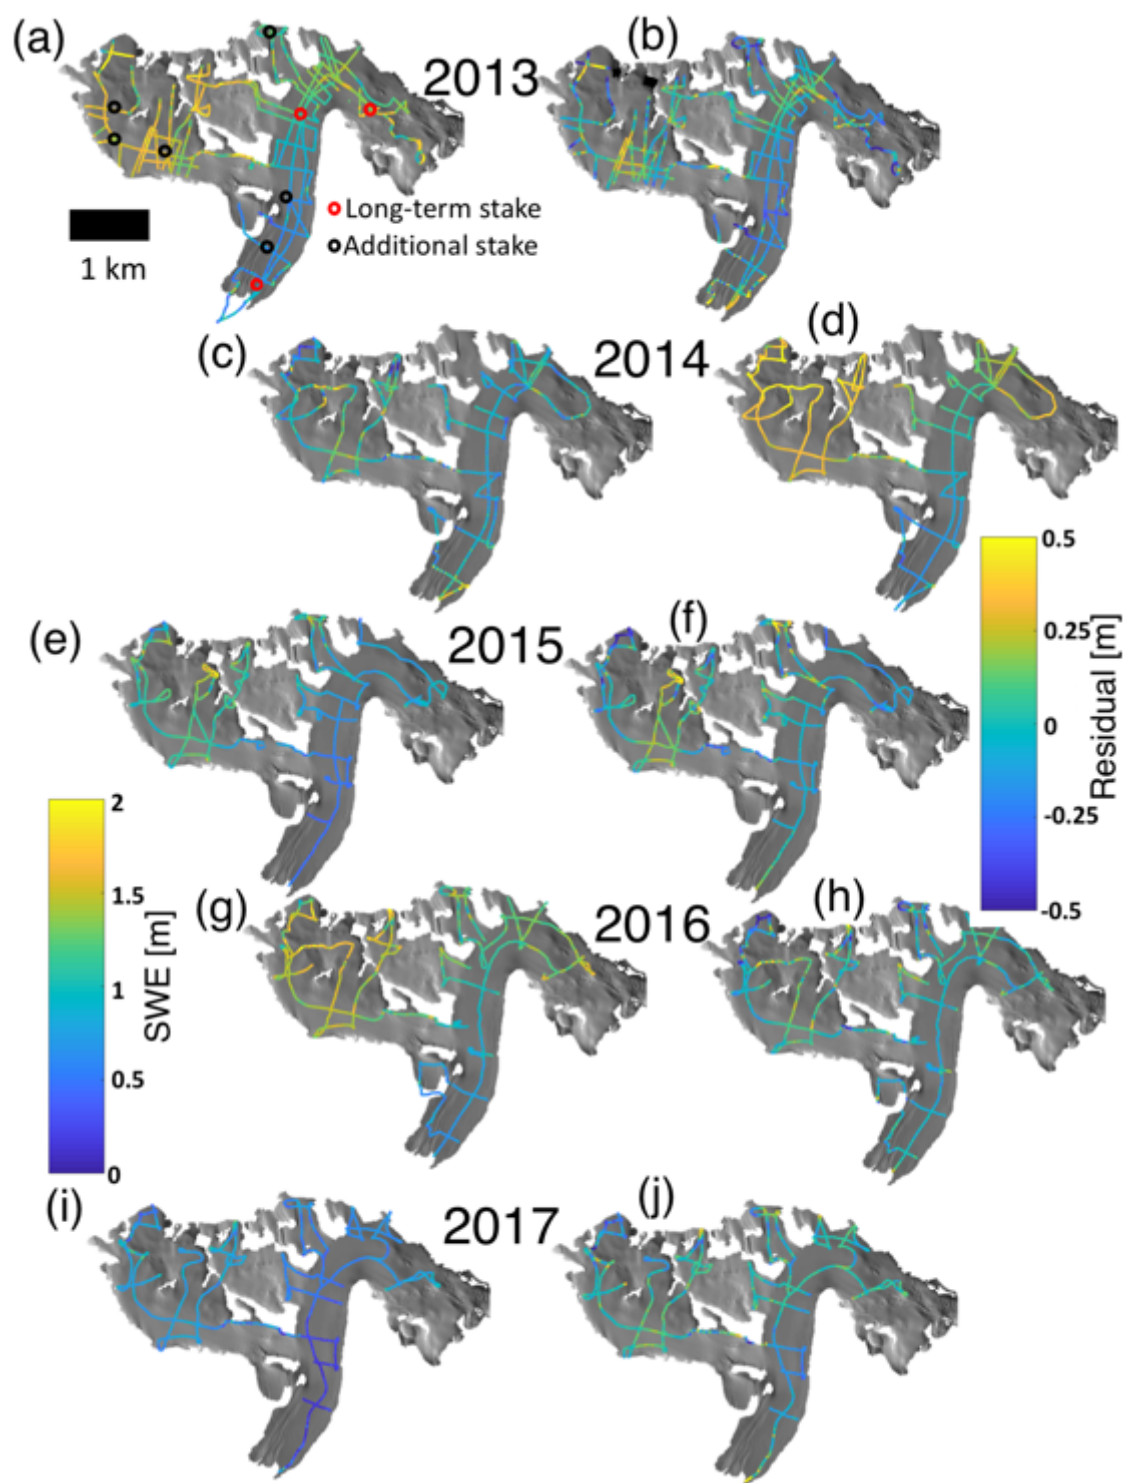

51  
52  
53  
54

55 Figure S2. GPR surveys (a,c,e,g,h) and MVR model residuals (b,d,f,h,j) for Wolverine Glacier  
56 for 2013-2017.

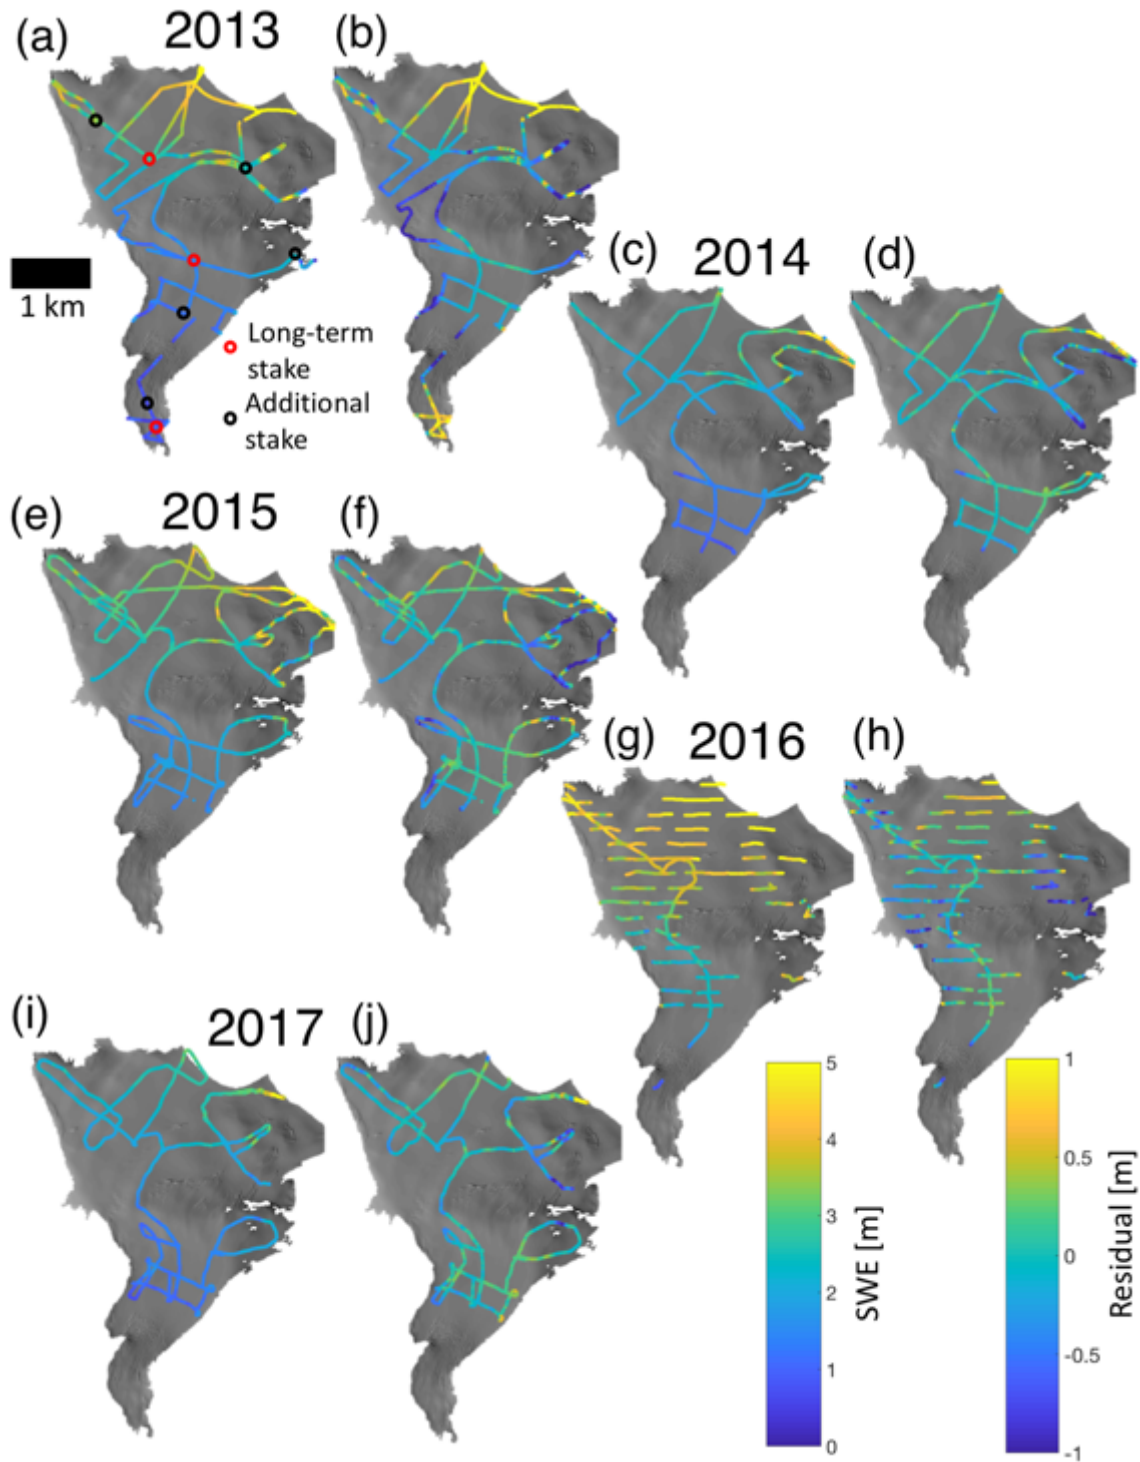

57  
58  
59  
60

61 Figure S3. DEM-derived terrain parameters for Wolverine Glacier.

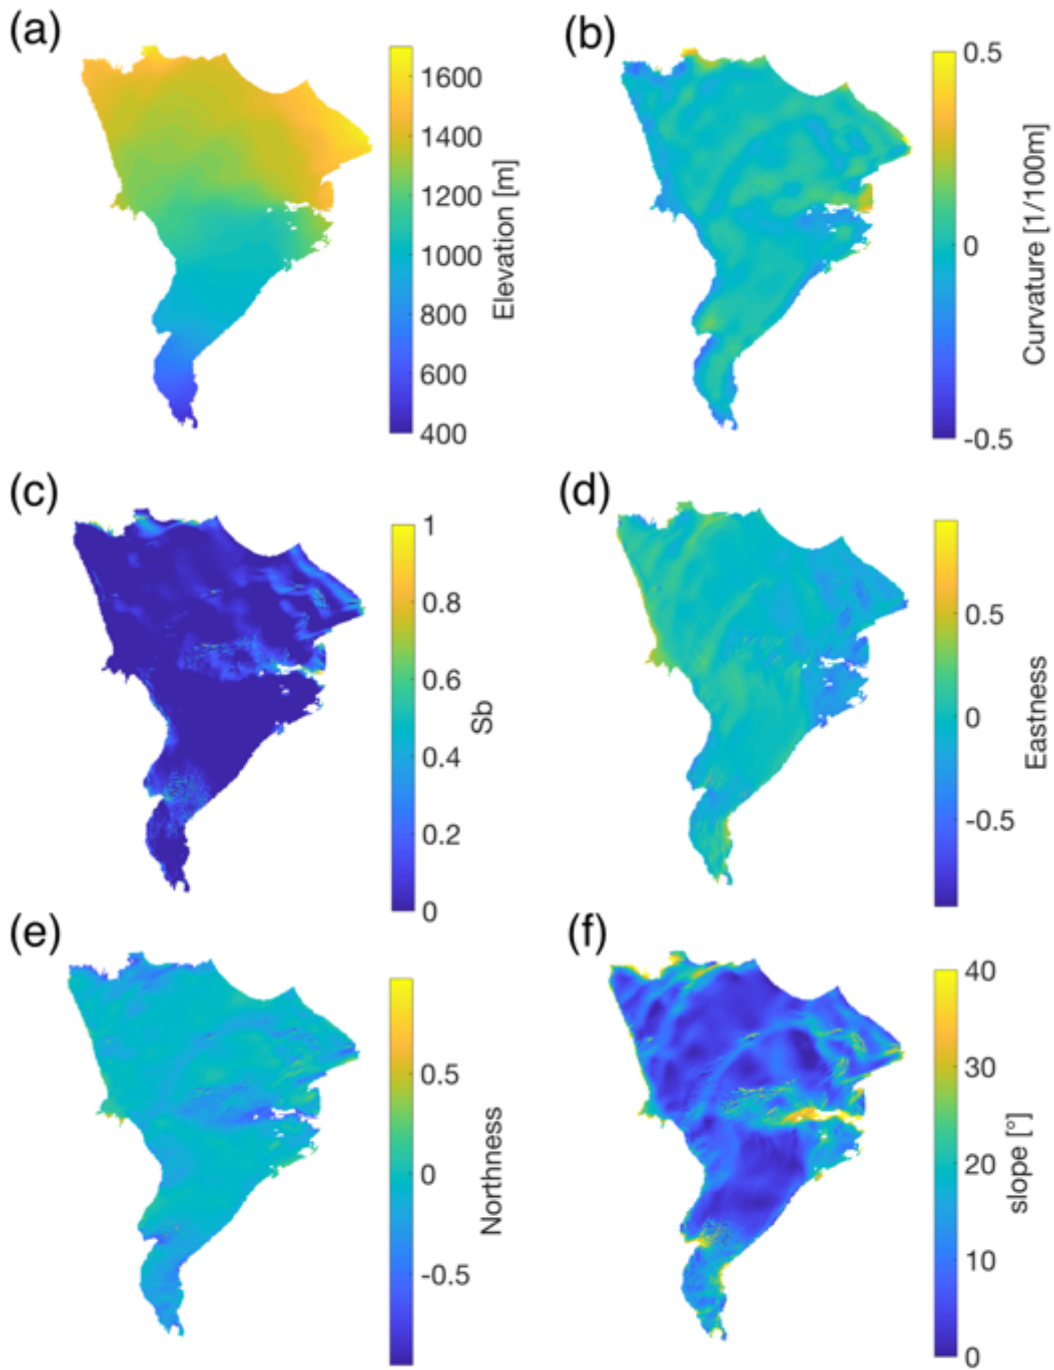

62  
63  
64  
65  
66

67 Figure S4. DEM-derived terrain parameters for Gulkana Glacier.

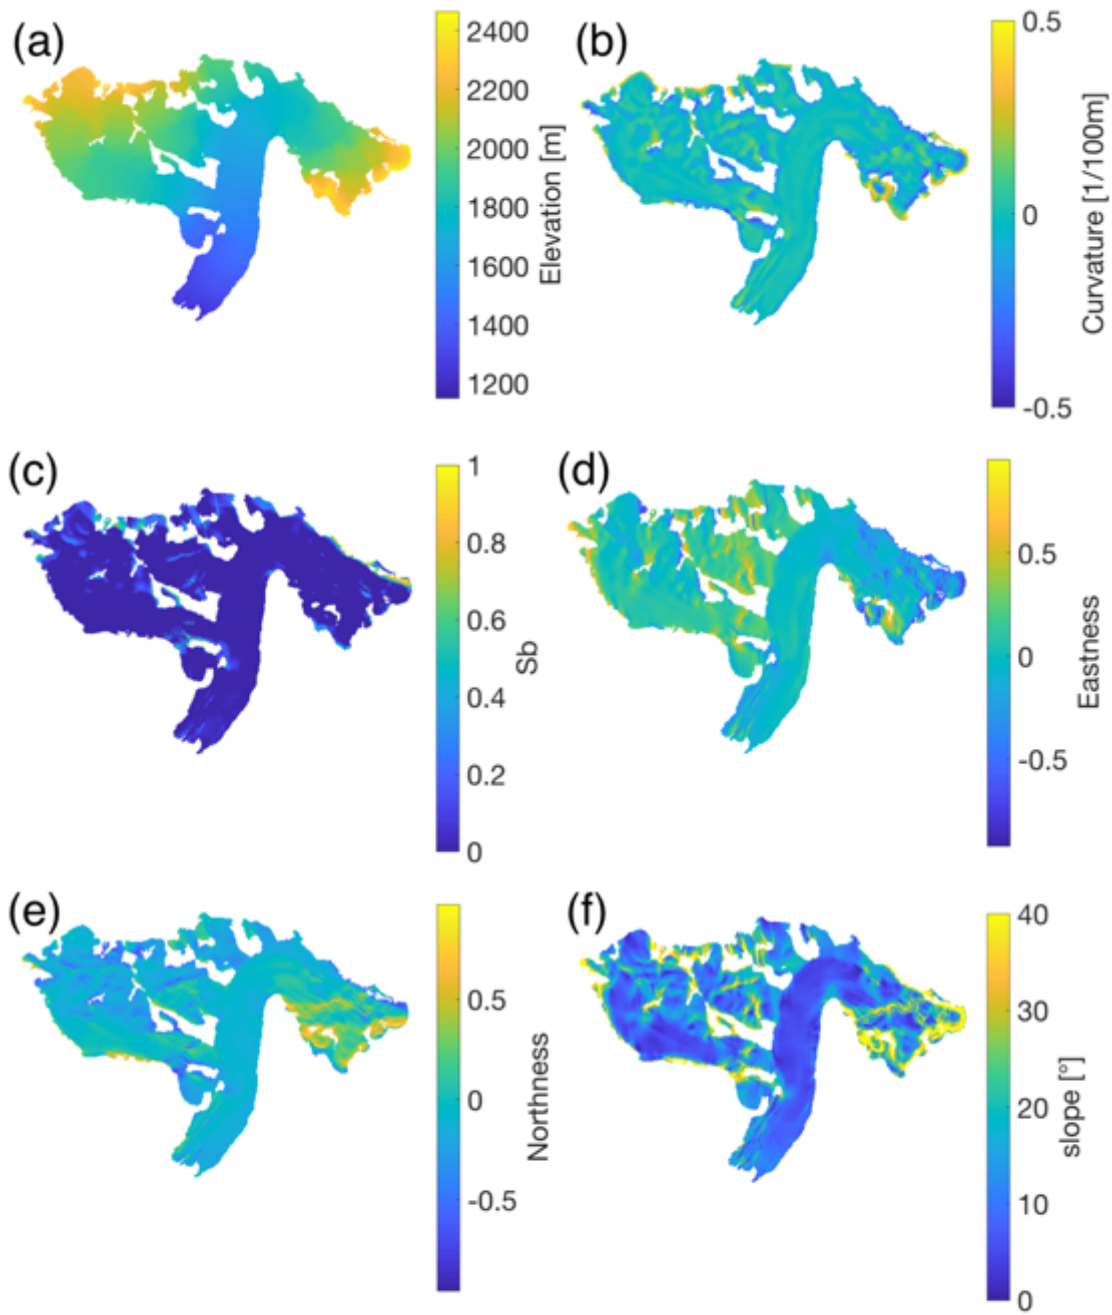

68  
69  
70  
71  
72

73 Figure S5. Example of training (black lines) and test (red lines) datasets for the 100 iteration loop  
74 for Gulkana. This same procedure was applied to both glaciers and all years.  
75

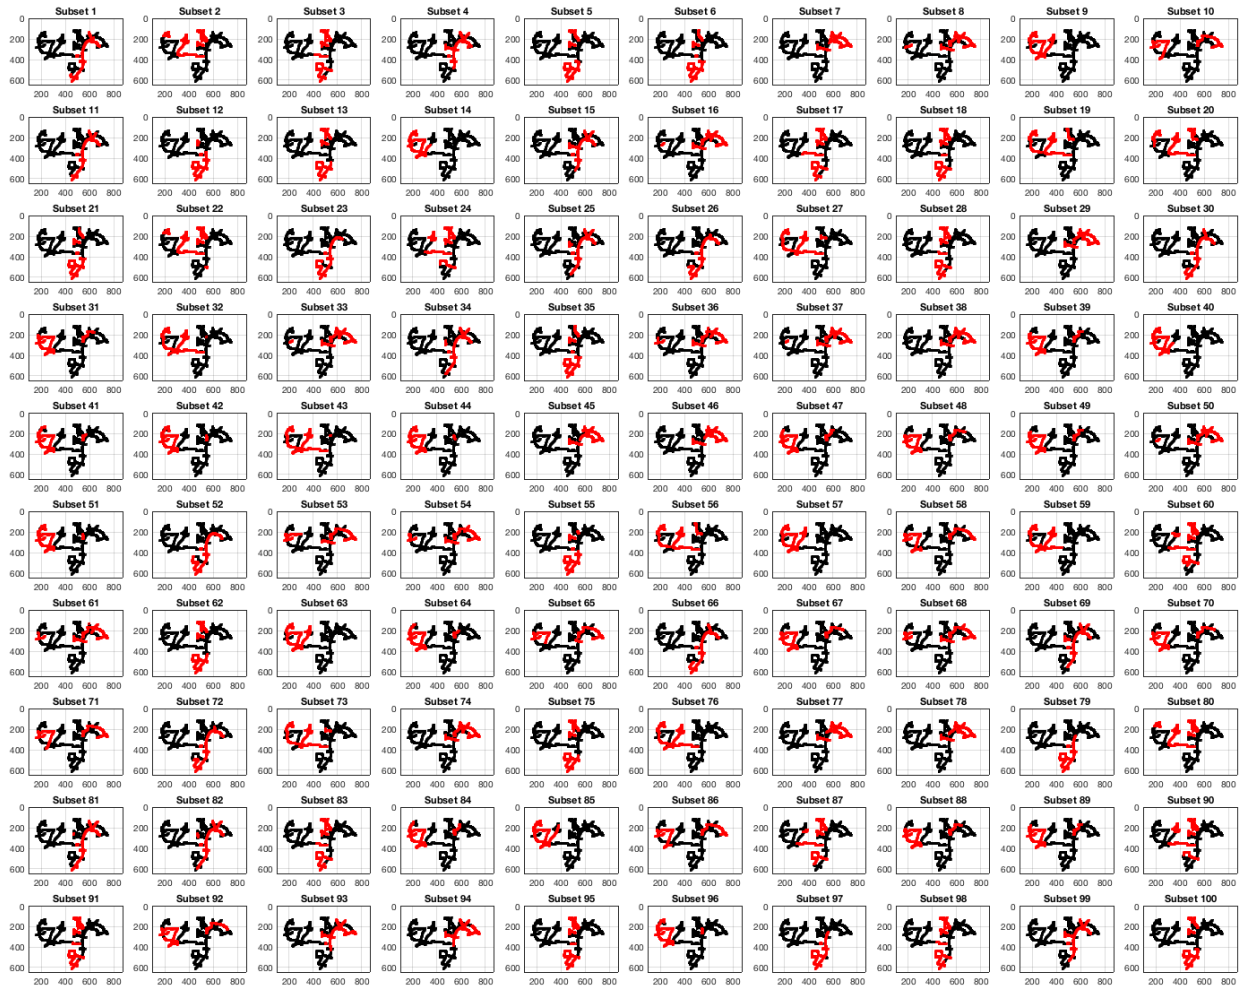

76  
77  
78  
79  
80  
81  
82  
83  
84  
85  
86  
87  
88



89 Figure S6. Average wind rose from *in situ* weather station for (a) Wolverine and (b) Gulkana  
90 over the five-year study period.

91  
92

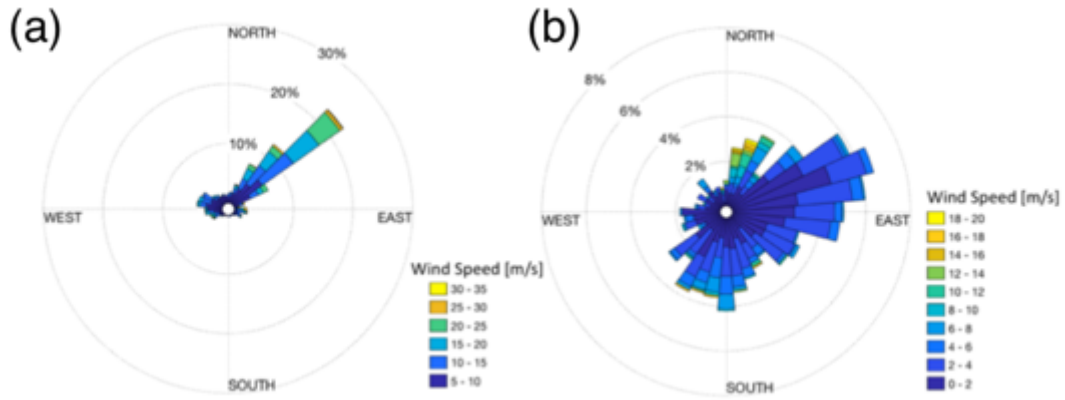

93  
94  
95  
96  
97  
98  
99  
100  
101  
102  
103  
104  
105  
106  
107  
108  
109  
110  
111  
112  
113  
114  
115  
116  
117  
118

119 Figure S7. Distributed normalized SWE fields for Gulkana glacier from MVR (a,c,e,g,i) and  
120 regression tree model (b,d,f,h,j) for 2013-2017.

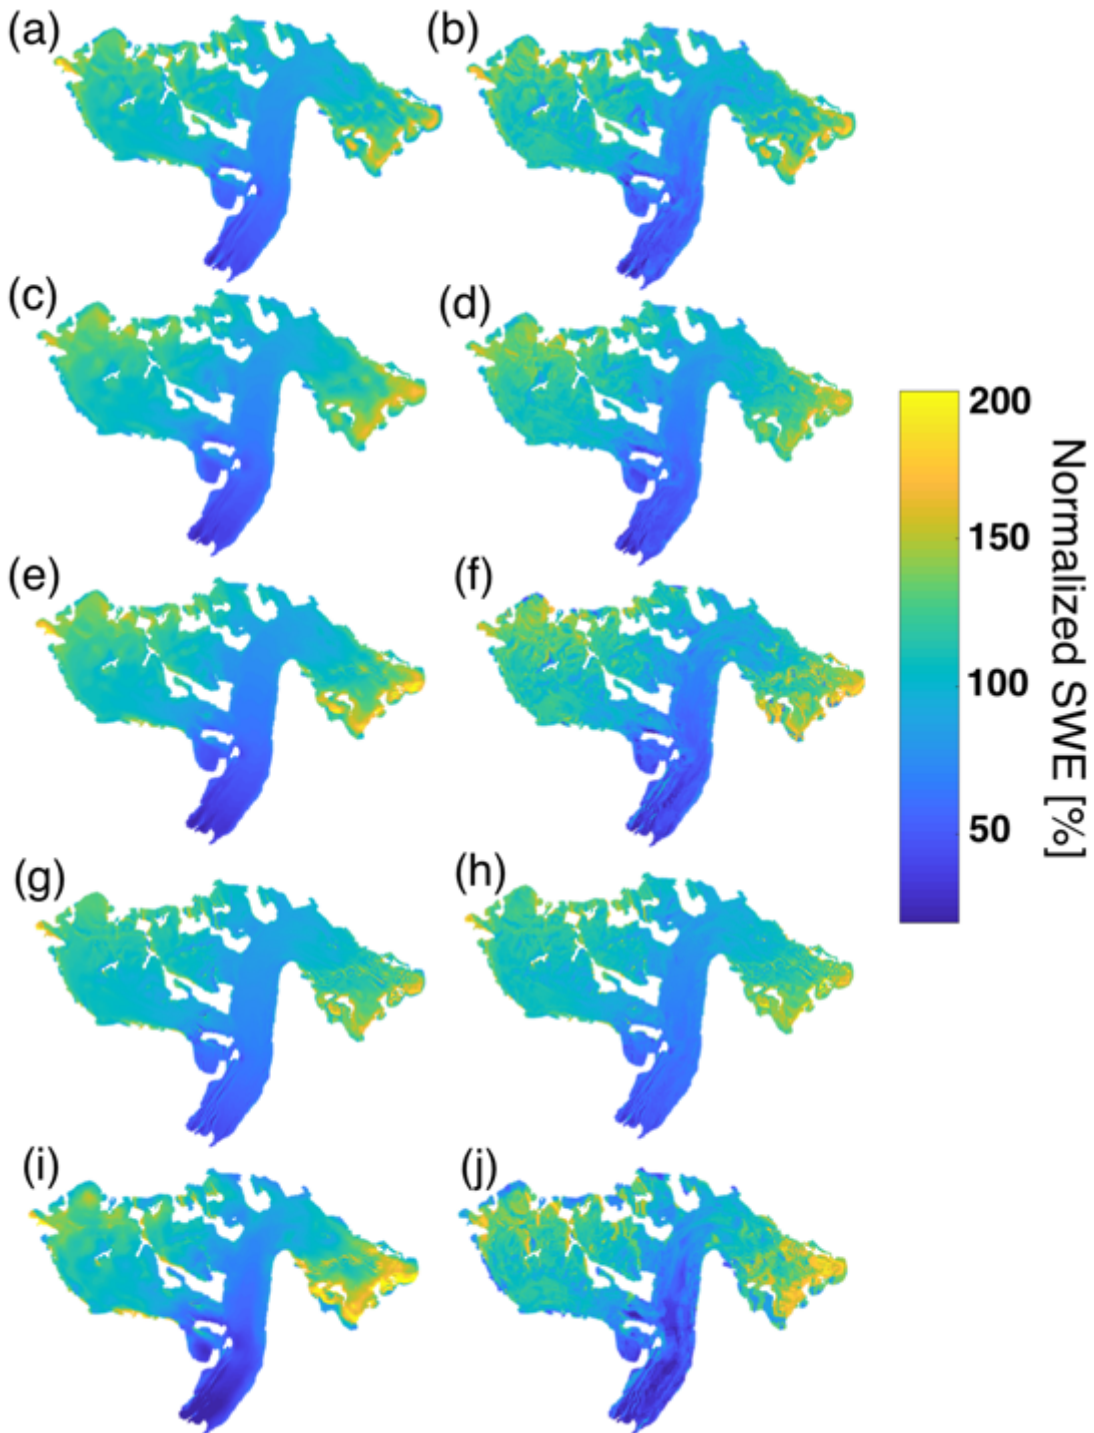

121  
122  
123  
124

125 Figure S8. Distributed normalized SWE fields for Wolverine glacier MVR (a,c,e,g,i) and  
126 regression tree model (b,d,f,h,j) for 2013-2017.

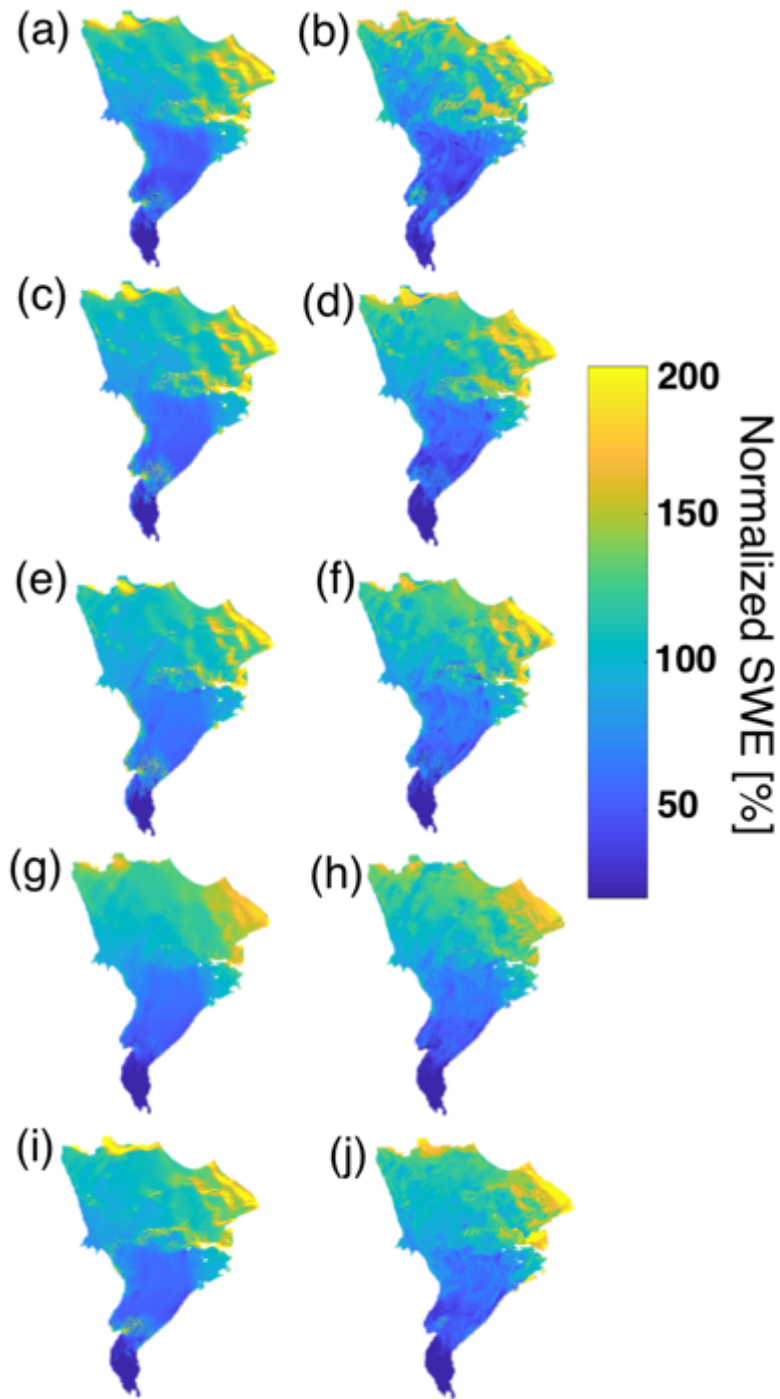

127  
128  
129  
130

131

132 Figure S9. Median out-of-bag predictor importance estimates from the regression trees for (a)

133 Gulkana and (b) Wolverine glaciers.

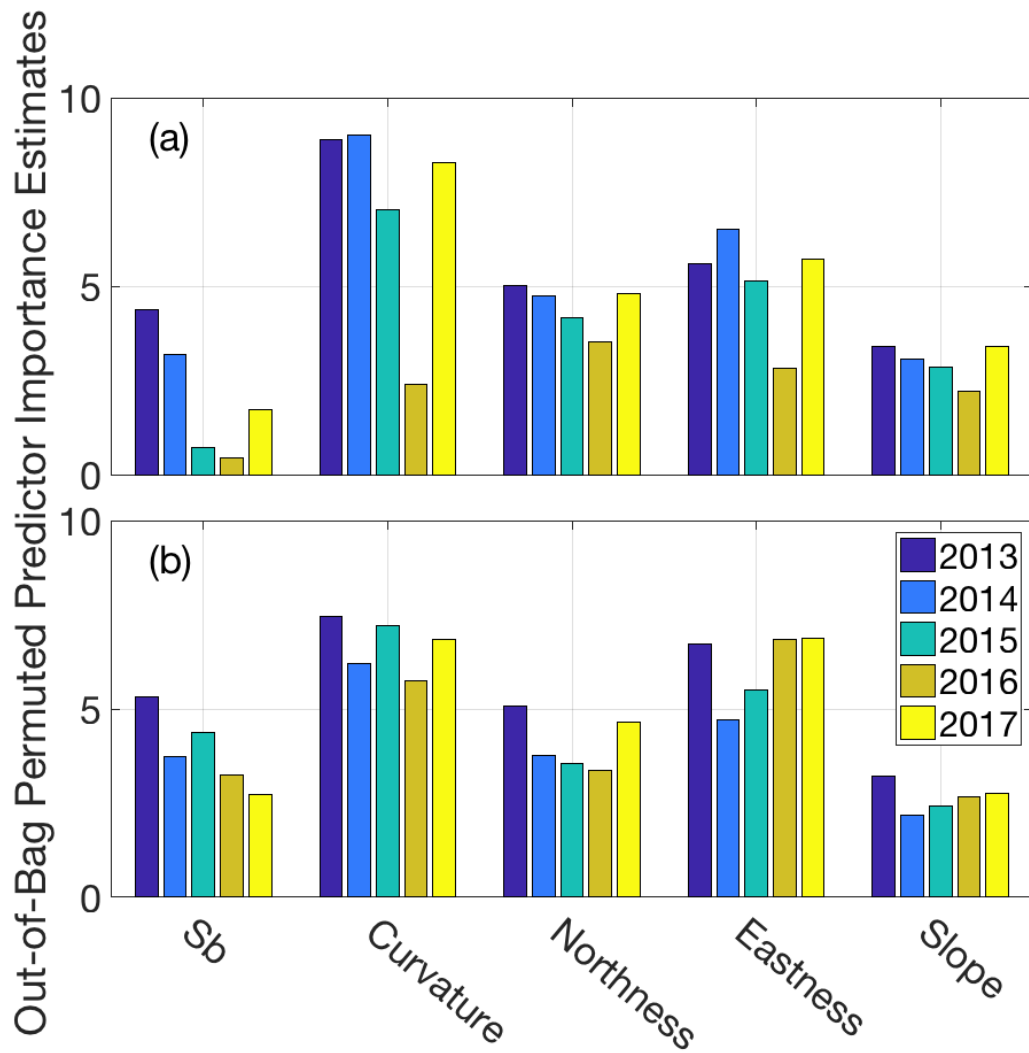

134

135

136

137

138

139

140

141

142

143

144

145 Figure S10. Photograph of the off-glacier terrain near Wolverine Glacier showing significantly  
146 greater spatial variability in SWE. Photograph was taken in April 2017.  
147

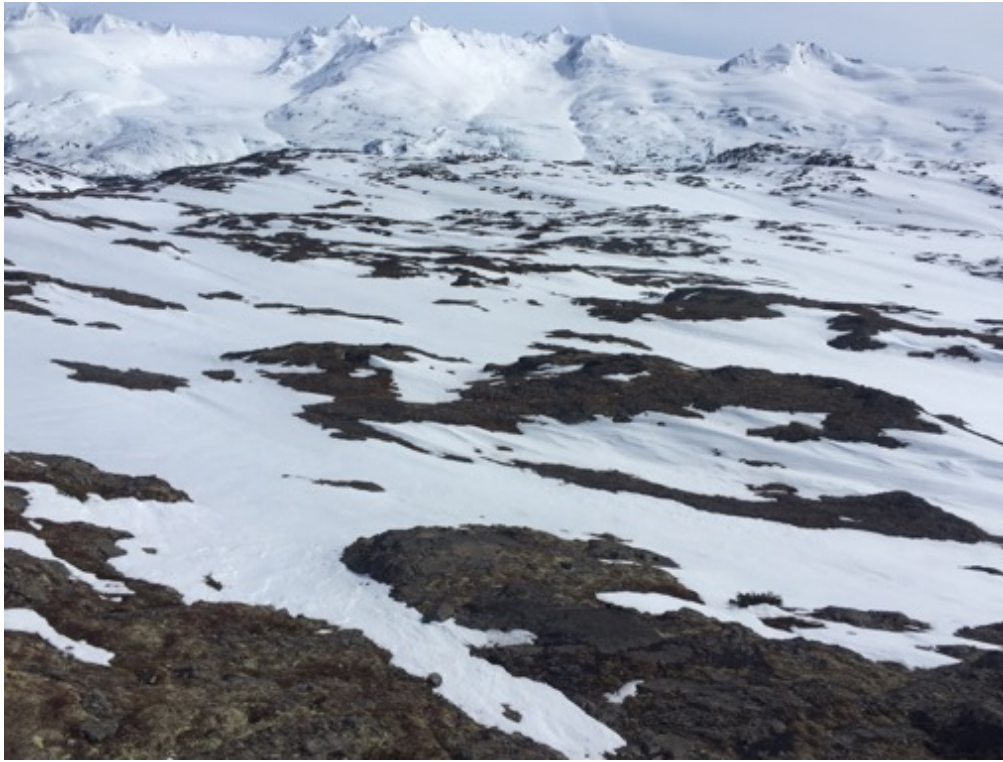

148  
149  
150

Figure S11. Photograph of Wolverine Glacier's lower icefall in May 2014 showing exposed ice.

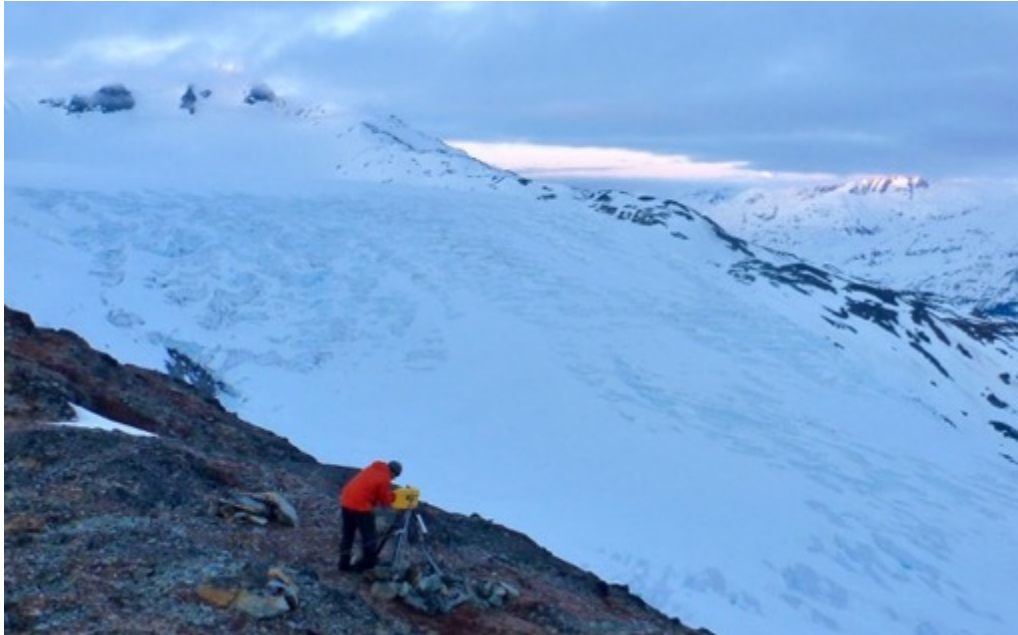

151
